# Supplementary material for: A prospective study of serum metabolites and glioma risk
Source: PubMed Central journal article supplement (PMC5642561; doi:10.18632/oncotarget.19705), 2017-07-31
Supplement: oncotarget-08-70366-s001.pdf [file oncotarget-08-70366-s001.pdf]

## A prospective study of serum metabolites and glioma risk

### SUPPLEMENTARY MATERIALS

**Supplementary Table 1: Serum metabolites related to risk of glioma: 0-9 years from blood draw to glioma diagnosis ( $P < 0.05$ )<sup>1</sup>**

| Metabolite                                         | Sub-pathway                               | Odds Ratio | 95% CI     | <i>P</i> value | <i>P</i> for Chemical Class |
|----------------------------------------------------|-------------------------------------------|------------|------------|----------------|-----------------------------|
| <b>Amino Acids and Amino Acid Derivatives</b>      |                                           |            |            |                | 0.39                        |
| Leucine                                            | Leucine, isoleucine and valine metabolism | 0.52       | 0.28, 0.96 | 0.0378         |                             |
| 2-Hydroxy-3-methylvalerate                         | Leucine, isoleucine and valine metabolism | 0.51       | 0.27, 0.97 | 0.0415         |                             |
| 2,3-Dihydroxy-2-methylbutyrate                     | Leucine, isoleucine and valine metabolism | 1.82       | 1.01, 3.31 | 0.0479         |                             |
| Phenyllactate (PLA)                                | Phenylalanine and tyrosine metabolism     | 0.51       | 0.27, 0.95 | 0.0335         |                             |
| O-Cresol sulfate                                   | Phenylalanine and tyrosine metabolism     | 2.20       | 1.06, 4.56 | 0.0350         |                             |
| <b>Lipids</b>                                      |                                           |            |            |                | 0.72                        |
| 1-(1-Enyl-palmitoyl)-GPC (P-16:0)                  | Lysoplasmalogen                           | 1.98       | 1.02, 3.86 | 0.0436         |                             |
| 1-(1-Enyl-stearoyl)-GPE (P-18:0)                   | Lysoplasmalogen                           | 1.95       | 1.02, 3.72 | 0.0437         |                             |
| 1-Palmitoyl-2-linoleoyl-GPI (16:0/18:2)            | Phospholipid metabolism                   | 0.44       | 0.22, 0.87 | 0.0181         |                             |
| Eicosapentaenoylcholine                            | Phospholipid metabolism                   | 1.92       | 1.01, 3.68 | 0.0476         |                             |
| Cholate                                            | Primary bile acid metabolism              | 0.42       | 0.19, 0.93 | 0.0328         |                             |
| Glycochenodeoxycholate                             | Primary bile acid metabolism              | 0.52       | 0.29, 0.96 | 0.0352         |                             |
| Chenodeoxycholate                                  | Primary bile acid metabolism              | 0.52       | 0.27, 1.00 | 0.0495         |                             |
| Glycodeoxycholate                                  | Secondary bile acid metabolism            | 0.50       | 0.25, 1.00 | 0.0484         |                             |
| Sphingomyelin (d18:2/24:1, d18:1/24:2)             | Sphingolipid metabolism                   | 2.76       | 1.24, 6.16 | 0.0130         |                             |
| Sphingomyelin (d18:1/18:1, d18:2/18:0)             | Sphingolipid metabolism                   | 2.85       | 1.20, 6.76 | 0.0178         |                             |
| Sphingomyelin (d18:1/17:0, d17:1/18:0, d19:1/16:0) | Sphingolipid metabolism                   | 2.20       | 1.09, 4.46 | 0.0282         |                             |
| Palmitoyl sphingomyelin (d18:1/16:0)               | Sphingolipid metabolism                   | 2.07       | 1.05, 4.05 | 0.0344         |                             |
| Sphingomyelin (d18:2/23:1)                         | Sphingolipid metabolism                   | 2.16       | 1.00, 4.67 | 0.0488         |                             |
| <b>Xenobiotics</b>                                 |                                           |            |            |                | 0.22                        |
| 3-Methyl catechol sulfate                          | Benzoate metabolism                       | 2.26       | 1.11, 4.58 | 0.0237         |                             |
| Methyl 4-hydroxybenzoate sulfate                   | Benzoate metabolism                       | 0.49       | 0.26, 0.92 | 0.0258         |                             |
| 2-Ethylphenylsulfate                               | Benzoate metabolism                       | 3.01       | 1.11, 8.17 | 0.0300         |                             |
| 3-Methyl catechol sulfate                          | Benzoate metabolism                       | 2.06       | 1.06, 3.99 | 0.0323         |                             |
| 3-Hydroxypyridine sulfate                          | Chemical                                  | 2.30       | 1.04, 5.12 | 0.0408         |                             |
| Isoeugenol sulfate                                 | Food component/plant                      | 2.10       | 1.09, 4.03 | 0.0256         |                             |
| 4-Vinylguaiacol sulfate                            | Food component/plant                      | 2.51       | 1.04, 6.06 | 0.0414         |                             |
| N-(2-Furoyl)glycine                                | Food component/plant                      | 2.50       | 1.02, 6.14 | 0.0455         |                             |

<sup>1</sup>Conditional logistic regression models were used to estimate odds ratio and their 95% confidence intervals (CIs), with only matching factors adjusted in the model. The odds ratio is for one-standard deviation increase in metabolite level. The table is sorted by chemical class, sub-pathway, and *P* value. The analysis is based on 31 cases and 31 controls.

**Supplementary Table 2: Serum metabolites related to risk of glioma:  $\geq 9$  years from blood draw to glioma diagnosis ( $P < 0.05$ )<sup>1</sup>**

| Metabolite                                                    | Sub-pathway                                          | Odds Ratio | 95% CI     | P value | P for Chemical Class |
|---------------------------------------------------------------|------------------------------------------------------|------------|------------|---------|----------------------|
| <b>Amino Acids and Amino Acid Derivatives</b>                 |                                                      |            |            |         | 0.19                 |
| Creatine                                                      | Creatine metabolism                                  | 0.45       | 0.23, 0.89 | 0.0218  |                      |
| 4-Hydroxyglutamate                                            | Glutamate metabolism                                 | 0.39       | 0.19, 0.80 | 0.0103  |                      |
| Pyroglutamine                                                 | Glutamate metabolism                                 | 2.14       | 1.16, 3.94 | 0.0147  |                      |
| Betaine                                                       | Glycine, serine and threonine metabolism             | 1.90       | 1.02, 3.52 | 0.0425  |                      |
| N-Acetyl-1-methylhistidine                                    | Histidine metabolism                                 | 0.55       | 0.33, 0.94 | 0.0287  |                      |
| 1-Methylimidazoleacetate                                      | Histidine metabolism                                 | 0.40       | 0.17, 0.95 | 0.0376  |                      |
| Cysteine S-sulfate                                            | Methionine, cysteine, SAM and taurine metabolism     | 0.38       | 0.16, 0.90 | 0.0271  |                      |
| Dopamine 3-O-sulfate                                          | Phenylalanine and tyrosine metabolism                | 0.27       | 0.11, 0.67 | 0.0046  |                      |
| N-Acetytyrosine                                               | Phenylalanine and tyrosine metabolism                | 0.51       | 0.29, 0.90 | 0.0209  |                      |
| Tyramine O-sulfate                                            | Phenylalanine and tyrosine metabolism                | 0.47       | 0.23, 0.98 | 0.0436  |                      |
| N-Acetyltryptophan                                            | Tryptophan metabolism                                | 0.38       | 0.16, 0.89 | 0.0263  |                      |
| N-Acetylkynurenine                                            | Tryptophan metabolism                                | 0.52       | 0.27, 0.99 | 0.0464  |                      |
| Argininate                                                    | Urea cycle; arginine and proline metabolism          | 0.31       | 0.14, 0.68 | 0.0036  |                      |
| 2-Oxoarginine                                                 | Urea cycle; arginine and proline metabolism          | 0.23       | 0.08, 0.64 | 0.0048  |                      |
| Ornithine                                                     | Urea cycle; arginine and proline metabolism          | 2.27       | 1.14, 4.53 | 0.0204  |                      |
| Pro-hydroxy-pro                                               | Urea cycle; arginine and proline metabolism          | 1.86       | 1.01, 3.41 | 0.0466  |                      |
| <b>Carbohydrates</b>                                          |                                                      |            |            |         | 0.14                 |
| Mannitol/sorbitol                                             | Fructose, mannose and galactose metabolism           | 0.34       | 0.12, 0.92 | 0.0333  |                      |
| Pyruvate                                                      | Glycolysis, gluconeogenesis, and pyruvate metabolism | 0.50       | 0.27, 0.91 | 0.0238  |                      |
| <b>Cofactors and Vitamins</b>                                 |                                                      |            |            |         | 0.08                 |
| Trigonelline (N <sup>1</sup> -methylnicotinate)               | Nicotinate and nicotinamide metabolism               | 1.86       | 1.02, 3.37 | 0.0427  |                      |
| N1-Methyl-4-pyridone-3-carboxamide                            | Nicotinate and nicotinamide metabolism               | 0.49       | 0.24, 1.00 | 0.0499  |                      |
| Pantothenate                                                  | Pantothenate and CoA metabolism                      | 0.50       | 0.26, 0.96 | 0.0389  |                      |
| <b>Energy</b>                                                 |                                                      |            |            |         | 0.28                 |
| Succinylcarnitine                                             | TCA cycle                                            | 0.24       | 0.09, 0.69 | 0.0075  |                      |
| Alpha-ketoglutarate                                           | TCA cycle                                            | 0.52       | 0.27, 1.00 | 0.0498  |                      |
| <b>Lipids</b>                                                 |                                                      |            |            |         | 0.40                 |
| Palmitoleoyl-arachidonoyl-glycerol (16:1/20:4)                | Diacylglycerol                                       | 0.40       | 0.18, 0.86 | 0.0196  |                      |
| Linoleoyl-docosahexaenoyl-glycerol (18:2/22:6)                | Diacylglycerol                                       | 0.56       | 0.33, 0.93 | 0.0255  |                      |
| Oleoyl-arachidonoyl-glycerol (18:1/20:4)                      | Diacylglycerol                                       | 0.55       | 0.31, 0.96 | 0.0364  |                      |
| Stearoyl-arachidonoyl-glycerol (18:0/20:4)                    | Diacylglycerol                                       | 0.50       | 0.26, 0.97 | 0.0405  |                      |
| Stearoyl-arachidonoyl-glycerol (18:0/20:4)                    | Diacylglycerol                                       | 0.54       | 0.30, 0.97 | 0.0407  |                      |
| Linoleoyl-arachidonoyl-glycerol (18:2/20:4)                   | Diacylglycerol                                       | 0.58       | 0.34, 0.99 | 0.0458  |                      |
| Margaroylcarnitine                                            | Fatty Acid metabolism (Acyl carnitine)               | 1.92       | 1.09, 3.37 | 0.0233  |                      |
| Eicosenoylcarnitine (C20:1)                                   | Fatty Acid metabolism (Acyl carnitine)               | 2.84       | 1.15, 6.99 | 0.0234  |                      |
| Myristoylcarnitine (C14)                                      | Fatty Acid metabolism (Acyl carnitine)               | 1.92       | 1.00, 3.66 | 0.0489  |                      |
| 3-Methylglutarate/2-methylglutarate                           | Fatty acid, dicarboxylate                            | 3.14       | 1.35, 7.35 | 0.0082  |                      |
| Adipate                                                       | Fatty acid, dicarboxylate                            | 2.13       | 1.10, 4.12 | 0.0251  |                      |
| Sebacate (decanedioate)                                       | Fatty acid, dicarboxylate                            | 2.30       | 1.02, 5.17 | 0.0439  |                      |
| 3-Hydroxysebacate                                             | Fatty acid, monohydroxy                              | 2.38       | 1.05, 5.38 | 0.0369  |                      |
| 1-Dihomo-linolenylglycerol (20:3)                             | Monoacylglycerol                                     | 0.33       | 0.14, 0.77 | 0.0106  |                      |
| 1-Docosahexaenoylglycerol (22:6)                              | Monoacylglycerol                                     | 0.44       | 0.21, 0.91 | 0.0265  |                      |
| 1-Linolenoylglycerol (18:3)                                   | Monoacylglycerol                                     | 0.53       | 0.29, 0.98 | 0.0442  |                      |
| 1-Linoleoylglycerol (18:2)                                    | Monoacylglycerol                                     | 0.59       | 0.36, 0.99 | 0.0456  |                      |
| 1-Stearoyl-2-arachidonoyl-GPC (18:0/20:4)                     | Phospholipid metabolism                              | 0.50       | 0.28, 0.89 | 0.0195  |                      |
| 1-Stearoyl-2-arachidonoyl-GPI (18:0/20:4)                     | Phospholipid metabolism                              | 0.51       | 0.27, 0.96 | 0.0366  |                      |
| 1-Palmitoyl-2-arachidonoyl-GPC (16:0/20:4n6)                  | Phospholipid metabolism                              | 0.55       | 0.30, 1.00 | 0.0486  |                      |
| 1-(1-Enyl-palmitoyl)-2-arachidonoyl-GPE (P-16:0/20:4)         | Plasmalogen                                          | 0.45       | 0.24, 0.87 | 0.0181  |                      |
| Glycochenolate sulfate                                        | Secondary bile acid metabolism                       | 0.46       | 0.23, 0.91 | 0.0255  |                      |
| Lignoceryl sphingomyelin (d18:1/24:0)                         | Sphingolipid metabolism                              | 0.19       | 0.05, 0.63 | 0.0072  |                      |
| Glycosyl-N-(2-hydroxynervonoyl)-sphingosine (d18:1/24:1(2OH)) | Sphingolipid metabolism                              | 0.51       | 0.27, 0.96 | 0.0361  |                      |
| Behenoyl dihydrosphingomyelin (d18:0/22:0)                    | Sphingolipid metabolism                              | 0.46       | 0.22, 0.95 | 0.0372  |                      |
| 4-Cholesten-3-one                                             | Sterol                                               | 0.54       | 0.29, 0.98 | 0.0441  |                      |
| <b>Peptides</b>                                               |                                                      |            |            |         | 0.70                 |
| N-Acetylcarnosine                                             | Dipeptide derivative                                 | 0.40       | 0.17, 0.91 | 0.0290  |                      |
| <b>Xenobiotics</b>                                            |                                                      |            |            |         | 0.40                 |
| Hippurate                                                     | Benzoate metabolism                                  | 1.69       | 1.01, 2.83 | 0.0449  |                      |
| Eugenol sulfate                                               | Food component/plant                                 | 0.46       | 0.24, 0.87 | 0.0170  |                      |
| Tartarate                                                     | Food component/plant                                 | 0.52       | 0.28, 0.95 | 0.0330  |                      |
| 4-Allylphenol sulfate                                         | Food component/plant                                 | 0.51       | 0.26, 0.99 | 0.0478  |                      |

<sup>1</sup>Conditional logistic regression models were used to estimate odds ratio and their 95% confidence intervals (CIs), with only matching factors adjusted in the model. The odds ratio is for one standard deviation increase in metabolite level. The table is sorted by chemical class, sub-pathway, and p value. The analysis is based on 33 cases and 33 controls.

Supplementary Table 3: Serum metabolites related to glioma according to median caffeine intake

| Metabolite                           | Odds Ratio | 95% CI     | P value |
|--------------------------------------|------------|------------|---------|
| Xanthine metabolism                  |            |            |         |
| 1-Methylurate                        | 1.58       | 1.08, 2.30 | 0.017   |
| Caffeine intake*: low                | 1.70       | 0.90, 3.24 | 0.59    |
| Caffeine intake: high                | 1.49       | 0.88, 2.54 | 0.95    |
| 1-Methylxanthine                     | 1.63       | 1.09, 2.46 | 0.018   |
| Caffeine intake: low                 | 1.62       | 0.89, 2.95 | 0.64    |
| Caffeine intake: high                | 1.34       | 0.77, 2.35 | 0.91    |
| Paraxanthine                         | 1.52       | 1.05, 2.22 | 0.028   |
| Caffeine intake: low                 | 1.57       | 0.90, 2.77 | 0.61    |
| Caffeine intake: high                | 1.29       | 0.76, 2.19 | 0.98    |
| Theobromine                          | 1.53       | 1.02, 2.28 | 0.038   |
| Caffeine intake: low                 | 1.39       | 0.76, 2.54 | 0.74    |
| Caffeine intake: high                | 1.42       | 0.83, 2.41 | 0.97    |
| 5-Acetylamino-6-amino-3-methyluracil | 1.55       | 1.02, 2.35 | 0.038   |
| Caffeine intake: low                 | 1.39       | 0.81, 2.40 | 0.69    |
| Caffeine intake: high                | 1.33       | 0.73, 2.43 | 0.88    |
| Theophylline                         | 1.5        | 1.02, 2.22 | 0.041   |
| Caffeine intake: low                 | 1.57       | 0.86, 2.86 | 0.53    |
| Caffeine intake: high                | 1.16       | 0.67, 1.99 | 0.96    |
| 7-Methylxanthine                     | 1.47       | 1.01, 2.14 | 0.042   |
| Caffeine intake: low                 | 1.55       | 0.85, 2.83 | 0.73    |
| Caffeine intake: high                | 1.36       | 0.81, 2.27 | 0.95    |

\*10 individuals (7.8%) are missing caffeine intake data. Unconditional logistic regression model and age at enrollment was adjusted in the model. The odds ratio is for one-standard deviation increase in metabolite level.

**Supplementary Table 4: Gene set analysis (GSA) for sub-pathway of serum metabolites in glioma: stratified by time from blood draw to glioma diagnosis ( $P < 0.05$ )**

| <b>Sub-pathway</b>                                           | <b>No. of contributing metabolites</b> | <b><i>P</i> value from GSA</b> |
|--------------------------------------------------------------|----------------------------------------|--------------------------------|
| <b>Time from blood draw to glioma diagnosis: &lt;9 years</b> |                                        |                                |
| Primary bile acid metabolism                                 | 8                                      | 0.034                          |
| <b>Time from blood draw to glioma diagnosis: ≥9 years</b>    |                                        |                                |
| Urea cycle; arginine/proline metabolism                      | 16                                     | 0.003                          |
| Glycolysis, gluconeogenesis, and pyruvate metabolism         | 5                                      | 0.013                          |
| Monoacylglycerol                                             | 14                                     | 0.017                          |
| Histidine metabolism                                         | 11                                     | 0.028                          |
| Food component/plant                                         | 32                                     | 0.036                          |
| Diacylglycerol                                               | 21                                     | 0.045                          |
